# Supplementary material
Source: PubMed Central journal article supplement (PMC2639675)
Supplement: 97320630003089S1.pdf [file 97320630003089S1.pdf]

### Supplementary material

| S. No | Marine compound | IUPAC name                                                               | Molecular formula and Mol. Wt.                                                 | Gold score |
|-------|-----------------|--------------------------------------------------------------------------|--------------------------------------------------------------------------------|------------|
| 1     | LAMIVUDINE      | 4-amino-1-[(2R,5S)-2-(hydroxymethyl)-1,3-oxathiolan-5-yl]pyrimidin-2-one | C <sub>8</sub> H <sub>11</sub> N <sub>3</sub> O <sub>3</sub> S<br>229.257g/mol | 45.0218    |
| 2     | BATZELLINE -D   | Pyrrolo[4,3,2-de]quinoline-7,8-dione, 6-chloro-1,3,4,5-tetrahydro-       | C <sub>10</sub> H <sub>7</sub> ClN <sub>2</sub> O <sub>2</sub><br>222.628g/mol | 44.3852    |
| 3     | ACYCLOVIR       | 2-amino-9-(2-hydroxyethoxymethyl)-3H-purin-6-one                         | C <sub>8</sub> H <sub>11</sub> N <sub>5</sub> O <sub>3</sub><br>225.205g/mol   | 43.1362    |
| 4     | THIOACETAMIDE   | Ethanethioamide                                                          | C <sub>2</sub> H <sub>5</sub> NS<br>75.132800 g/mol                            | 42.7412    |

**Table 1:** Table shows the best docked Marine compounds and its GOLD score.
